# Supplementary material
Source: PubMed Central journal article supplement (PMC5635424)
Supplement: NIHMS908706-supplement-Appendix.pdf [file NIHMS908706-supplement-Appendix.pdf]

## Supplementary Appendix

This appendix has been provided by the authors to give readers additional information about their work.

Supplement to: Bellmunt J, de Wit R, Vaughn DJ, et al. Pembrolizumab as second-line therapy for advanced urothelial carcinoma. *N Engl J Med* 2017;376:1015-26. DOI: 10.1056/NEJMoa1613683

**Supplementary Appendix:** Pembrolizumab as Second-Line Therapy for Advanced Urothelial Carcinoma. Bellmunt J et al.

**Table of Contents**

|                                 |    |
|---------------------------------|----|
| List of Investigators .....     | 2  |
| Data Monitoring Committee ..... | 10 |
| Figure S1 .....                 | 11 |
| Figure S2 .....                 | 13 |
| Figure S3 .....                 | 15 |
| Table S1 .....                  | 16 |
| Table S2 .....                  | 17 |
| Table S3 .....                  | 21 |
| Table S4 .....                  | 24 |
| Table S5 .....                  | 26 |
| References .....                | 32 |

## List of Investigators

| <b>Country</b> | <b>Site Name</b>                                                    | <b>Principal Investigator</b> | <b>No. Patients Enrolled</b> |
|----------------|---------------------------------------------------------------------|-------------------------------|------------------------------|
| Australia      | Crown Princess Mary Cancer Centre<br>Westmead                       | Howard Gurney                 | 10                           |
|                | Princess Alexandra Hospital                                         | Elizabeth McCaffrey           | 1                            |
|                | Tasman Oncology Research Pty Ltd                                    | Andrew Hill                   | 2                            |
| Austria        | AKH der Stadt Wien - Medizinische<br>Universitaetskliniken          | Shahrokh Shariat              | 3                            |
|                | Krankenhaus der Barmherzigen<br>Schwestern                          | Wolfgang Loidl                | 2                            |
|                | Landeskrankenhaus Innsbruck –<br>Medizinische Universitaetskliniken | Renate Pichler                | 4                            |
|                | LKH Univ Klinikum Graz                                              | Hellmut Samonigg              | 2                            |
| Belgium        | CHU Sart Tilman-Service d'Oncologie<br>Médicale                     | Brieuc Sautois                | 4                            |
|                | UCL Saint-Luc - Oncologie Medicale                                  | Jean-Pascal Machiels          | 9                            |
| Canada         | CHUQ - Pavillon Hotel Dieu                                          | Yves Fradet                   | 13                           |
|                | Nova Scotia Cancer Centre                                           | Robyn Macfarlane              | 7                            |
| Chile          | Centro de Cancer Nuestra Senora de la<br>Esperanza                  | Cesar Sanchez                 | 5                            |
|                | Centro Oncologico Antofagasta                                       | Luis Matamala                 | 3                            |
| Denmark        | Aalborg University Hospital                                         | Mette Kempel                  | 4                            |

|         |                                          |                  |   |
|---------|------------------------------------------|------------------|---|
|         | Aarhus University Hospital               | Mads Agerbaek    | 5 |
|         | Herlev Hospital                          | Lisa Sengelov    | 5 |
|         | Rigshospitalet                           | Helle Pappot     | 5 |
| France  | APH Paris, Hopital Saint Louis           | Stephane Culine  | 8 |
|         | Centre Georges Francois Leclerc          | Sylvie Zanetta   | 6 |
|         | Centre Leon-Berard                       | Aude Flechon     | 3 |
|         | Hopital Cochin                           | Jerome Alexandre | 5 |
|         | Hopital European Georges Pompidou        | Stephane Oudard  | 3 |
| Germany | Johannes Gutenberg Universitat Mainz     | Andreas Neisius  | 6 |
|         | Medizinische Hochschule Hannover         | Axel Merseburger | 1 |
|         | Universitaetsklinikum Muenster           | Martin Boegemann | 3 |
|         | Universitaetsklinikum Schleswig-Holstein | Axel Merseburger | 1 |
| Hungary | Orszagos Onkologiai Intezet              | Lajos Geczi      | 6 |
|         | Pecs Tudomanyegyetem                     | Laszlo Mangel    | 1 |
|         | Semmelweis Egyetem                       | Peter Nyirady    | 2 |
|         | Somogy Megyei Kaposi Mor Oktatokorhaz    | Agnes Ruzsa      | 2 |
|         | Uzsoki Utcai Korhaz                      | Laszlo Landherr  | 4 |
| Ireland | Adelaide and Meath Hospital of Dublin    | Sean McDermott   | 4 |
| Israel  | Assaf Harofeh MC                         | Avishay Sella    | 5 |
|         | Hadassah Ein Karem [Jerusalem, Israel]   | Stephen Frank    | 5 |
|         | Meir Medical Center                      | Daniel Keizman   | 8 |

|       |                                                           |                    |    |
|-------|-----------------------------------------------------------|--------------------|----|
|       | Sheba Medical Center - Oncology<br>Division               | Raanan Berger      | 6  |
|       | Soroka Medical Center                                     | Keren Rouvinov     | 4  |
|       | Rabin Medical Center                                      | Eli Rosenbaum      | 5  |
|       | Rambam Medical Center                                     | Avivit Peer        | 7  |
| Italy | San Camillo and Forlanini Hospitals                       | Cora Sternberg     | 8  |
|       | Azienda Ospedaliera S. Maria degli<br>Angeli              | Giovanni Lo Re     | 5  |
|       | Azienda Policlinico Romano Umberto I                      | Enrico Cortesi     | 4  |
|       | Istituto Nazionale Per Lo Studio E La<br>Cura Dei Tumori  | Rosa Tambaro       | 7  |
|       | Fondazione IRCCS Istituto Nazionale<br>dei Tumori, Milano | Andrea Necchi      | 11 |
|       | Ospedale San Vincenzo di Taormina                         | Francesco Ferrau   | 1  |
| Japan | Chiba Cancer Center                                       | Satoshi Fukasawa   | 3  |
|       | Harasanshin Hospital                                      | Akito Yamaguchi    | 1  |
|       | Iwate Medical University Hospital                         | Wataru Obara       | 1  |
|       | Jichi Medical University Hospital                         | Tatsuya Takayama   | 2  |
|       | Kagoshima University Medical and<br>Dental Hospital       | Hideki Enokida     | 3  |
|       | Kansai Medical University Hirakata<br>Hospital            | Hidefumi Kinoshita | 2  |
|       | Keio University Hospital                                  | Mototsugu Oya      | 2  |

|             |                                                             |                    |    |
|-------------|-------------------------------------------------------------|--------------------|----|
|             | Kyushu University Hospital                                  | Akira Yokomizo     | 2  |
|             | Medical Hospital, Tokyo Medical And Dental University       | Minato Yokoyama    | 3  |
|             | Nagoya University Hospital                                  | Naoto Sassa        | 4  |
|             | Nara Medical University Hospital                            | Kiyohide Fujimoto  | 4  |
|             | Niigata Cancer Center Hospital                              | Toshihiro Saito    | 2  |
|             | Osaka Medical Center for Cancer and Cardiovascular Diseases | Kazuo Nishimura    | 4  |
|             | Osaka Medical College Hospital                              | Teruo Inamoto      | 2  |
|             | Saitama Medical University International Medical Center     | Masafumi Oyama     | 2  |
|             | Sapporo Medical University Hospital                         | Hiroshi Kitamura   | 2  |
|             | Tokushima University Hospital                               | Hiroomi Kanayama   | 2  |
|             | University of Tsukuba Hospital                              | Hiroyuki Nishiyama | 3  |
|             | Yamagata University Hospital                                | Tomoyuki Kato      | 2  |
|             | Yamaguchi University Hospital                               | Yoshiaki Yamamoto  | 6  |
| Netherlands | Erasmus MC                                                  | Ronald De Wit      | 12 |
|             | Medisch Centrum Alkmaar                                     | M. P. Hendriks     | 7  |
|             | Radboud University                                          | Winald Gerritsen   | 10 |
| New Zealand | Auckland City Hospital                                      | Fritha Hanning     | 2  |
|             | Canterbury Regional Cancer & Blood Service                  | David Gibbs        | 2  |
| Norway      | Haukeland Universitetssykehus, Klinisk                      | Svein Helle        | 2  |

|             |                                                                 |                           |    |
|-------------|-----------------------------------------------------------------|---------------------------|----|
|             | forskningspost voksne                                           |                           |    |
|             | Oslo Universitetssykehus<br>Radiumhospitalet                    | Gunnar Tafjord            | 4  |
| Peru        | Instituto Nacional de Enfermedades<br>Neoplasicas               | Silvia Neciosup de D.     | 2  |
| Poland      | Centrum Onkologii-Instytut im. Marii<br>Sklodowskiej-Curie      | Tomasz Demkow             | 3  |
| Portugal    | Centro Hospitalar Lisboa Norte EPE -<br>Hospital de Santa Maria | Antonio Quintela          | 3  |
|             | Fundacao Champalimaud                                           | Nuno Vau                  | 1  |
| Puerto Rico | Fundacion de Investigacion de Diego                             | Deana Hallman-<br>Navarro | 1  |
| Romania     | Centrul de Oncologie Sf. Nectarie SRL                           | Michael Schenker          | 4  |
|             | Institutul Oncologic Bucuresti Prof. Dr.<br>Alex. Trestioreanu  | Dana Stanculeanu          | 1  |
| Singapore   | National Cancer Centre Singapore                                | Ravindran<br>Kanesvaran   | 7  |
| South Korea | Asan Medical Center                                             | Jae Lyun Lee              | 13 |
|             | Seoul National University Hospital                              | Bhumsuk Keam              | 8  |
|             | Severance Hospital, Yonsei University<br>Health System          | Sun Young Rha             | 10 |
| Spain       | Hospital Gregorio Maranon                                       | Jose Arranz               | 5  |
|             | Hospital 12 de Octubre                                          | Daniel Castellano         | 6  |

|                |                                                |                      |    |
|----------------|------------------------------------------------|----------------------|----|
|                |                                                | Gauna                |    |
|                | Hospital Universitario La Paz                  | Enrique Espinosa     | 2  |
|                | Hospital Universitario Marques de Valdecilla   | Marta Lopez Brea     | 6  |
|                | Hospital Universitario San Carlos              | Javier Puente        | 4  |
|                | Instituto Valenciano de Oncologia (IVO)        | Miguel Climent Duran | 12 |
| Sweden         | Akademiska Sjukhuset                           | Anna Laurell         | 3  |
| Taiwan         | Chang Gung Memorial Hospital, Kaohsiung Branch | Po-Hui Chiang        | 6  |
|                | China Medical University Hospital              | Hsi-Chin Wu          | 2  |
|                | National Cheng Kung University Hospital        | Wu-Chou Su           | 6  |
|                | National Taiwan University Hospital            | Chia-Chi Lin         | 5  |
|                | Taipei Veterans General Hospital               | Yen-Hwa Chang        | 4  |
| Turkey         | Bezmialem Vakif University                     | Mahmut Gumus         | 3  |
|                | Erciyes Uni. Tip Fakultesi                     | Halit Karaca         | 3  |
|                | Istanbul Uni. Cerrahpasa Tip Fakultesi         | Zeynep Turna         | 5  |
|                | Pamukkale Unv. Tip Fak.                        | Arzu Yaren           | 2  |
| United Kingdom | Belfast City Hospital                          | Darren Mitchell      | 2  |
|                | The Royal Marsden NHS Foundation Trust         | Vincent Khoo         | 2  |
| United States  | Beth Israel Deaconess Medical Center           | Glenn Bublely        | 1  |



|                                                         |                    |    |
|---------------------------------------------------------|--------------------|----|
| Cleveland Clinic                                        | Petros Grivas      | 5  |
| Comprehensive Cancer Centers of Nevada                  | Nicholas Vogelzang | 12 |
| Dana Farber Cancer Institute                            | Joaquim Bellmunt   | 5  |
| Mount Sinai Medical Center                              | Matthew Galsky     | 1  |
| New York University Langone Medical Center              | Arjun Balar        | 4  |
| Shands Hospital - University of Florida                 | Long Dang          | 3  |
| Sidney Kimmel Center for Prostate and Urologic Cancers  | Dean Bajorin       | 2  |
| Smilow Cancer Hospital at Yale New Haven                | Daniel Petrylak    | 11 |
| UCLA Medical Center Hematology Oncology                 | Alexandra Drakaki  | 4  |
| UCSF Helen Diller Family Comprehensive Cancer Center    | Lawrence Fong      | 12 |
| USC Norris Comprehensive Cancer Center and Hospital     | David Quinn        | 9  |
| University Hospitals Case Medical Center                | Christopher Hoimes | 4  |
| University of California San Diego Moores Cancer Center | James Randall      | 1  |
| University of Chicago Medical Center                    | Peter O'Donnell    | 5  |

|  |                                                   |                    |    |
|--|---------------------------------------------------|--------------------|----|
|  | University of North Carolina - Cancer<br>Hospital | Matthew Milowsky   | 1  |
|  | University of Pennsylvania                        | David Vaughn       | 17 |
|  | University of Rochester Medical Center            | Elizabeth Guancial | 5  |
|  | West Clinic                                       | Bradley Somer      | 3  |

### **Data Monitoring Committee**

James J. Dignam, PhD: University of Chicago, Chicago, IL, USA

Mario A. Eisenberger, MD: Sidney Kimmel Cancer Center at Johns Hopkins, Baltimore, MD,  
USA

Phillip W. Kantoff, MD: Memorial Sloan Kettering Cancer Center, New York, NY, USA

Timothy M. Kuzel, MD: Rush University Medical Center, Chicago, IL, USA

**Figure S1. Patient Disposition and Treatment in the Intention-to-Treat Population.**

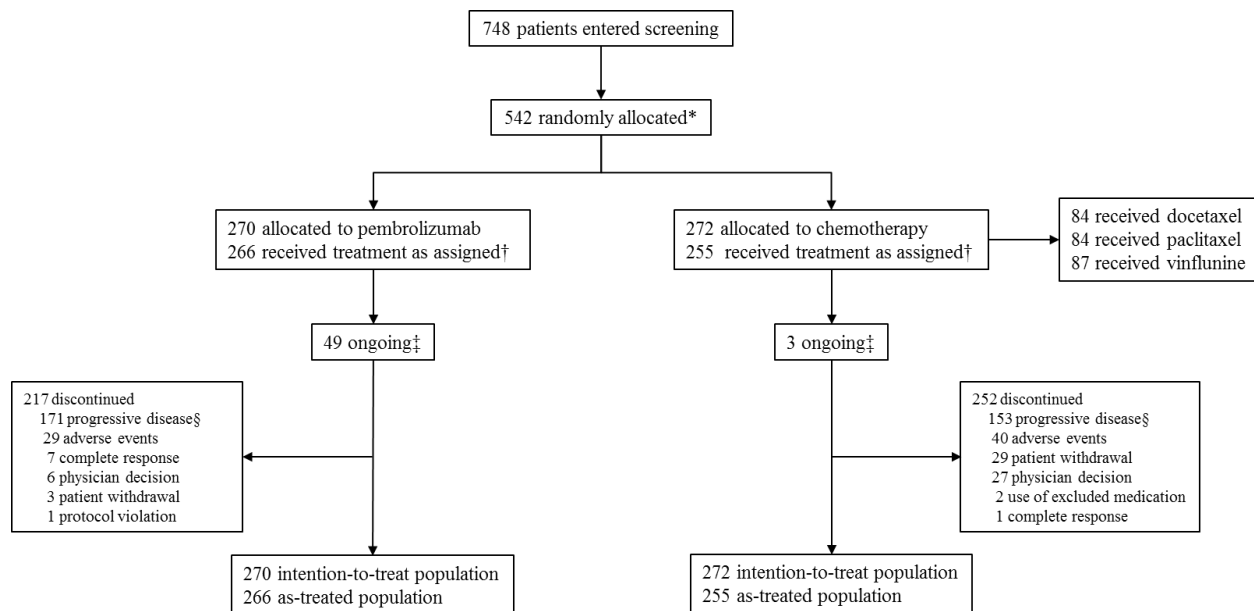

\*Reasons for screen failure were inadequate performance status (n=56), inadequate organ function (n=42), lack of written, informed consent (n=27), lack of tissue for biomarker analysis (n=23), lack of measurable disease based on Response Evaluation Criteria in Solid Tumors, version 1.1 (n=19), lack of progression on or recurrence after platinum-containing chemotherapy (n=18), prohibited concomitant condition (n=20), central nervous system metastases (n=10), receipt of >2 prior lines of systemic chemotherapy (n=9), lack of histologically or cytological confirmed, transitional cell or transitional cell predominant disease (n=8), additional metastases requiring active treatment (n=8), active infection requiring systemic therapy (n=7), age <18 years (n=6), inadequate contraception (n=6), diagnosis of immunodeficiency or receiving systemic corticosteroid therapy or other immunosuppressive therapy (n=6), received most recent anticancer therapy within the prohibited window or did not recover from all adverse events caused by a previously administered therapy (n=6), active cardiac disease (n=6), evidence of interstitial lung disease or active noninfectious pneumonitis (n=5), active hepatitis B or C infection (n=5), or other (n=37). Subjects may have failed screening for >1 reason.

†Reasons for not receiving study treatment were randomization in error based on failure to meet all eligibility criteria (n=2) and fatal adverse events (n=2) in the pembrolizumab group and withdrawal of consent after randomization (n=15), worsening physical condition (n=1), and a decrease in platelet count that precluded treatment (n=1) in the chemotherapy group.

‡Patients without a completed study medication discontinuation form.

§Includes patients with radiologic and clinical disease progression.

**Figure S2. Overall (Panel A) and Progression-Free (Panel B) Survival in the PD-L1 Combined Positive Score  $\geq 10\%$  Intention-to-Treat Population.** Shown are Kaplan-Meier estimates of overall and progression-free survival according to treatment group. Tick marks represent patients censored at the last time they were known to be alive (A) or alive and without disease progression assessed per RECIST v1.1 by blinded, independent central radiologic review (B). The intention-to-treat population includes all patients who were randomly assigned to study treatment. PD-L1 combined positive score (CPS) was defined as the percentage of tumor and infiltrating immune cells with PD-L1 expression out of the total number of tumor cells. The one-sided superiority thresholds for pembrolizumab were  $P=0.0065$  for overall survival and  $P=0.0029$  for progression-free survival.

(A)

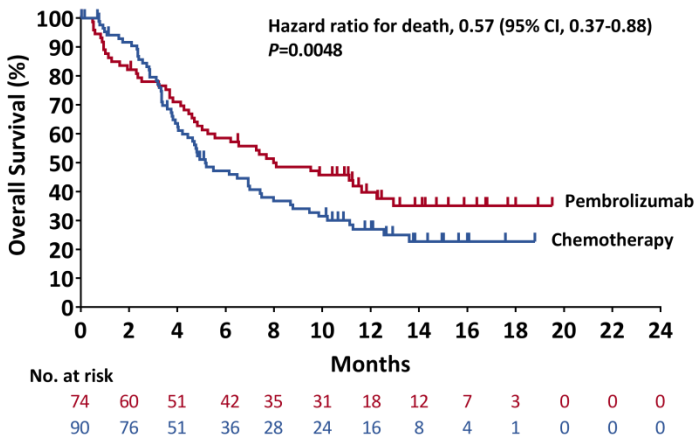

(B)

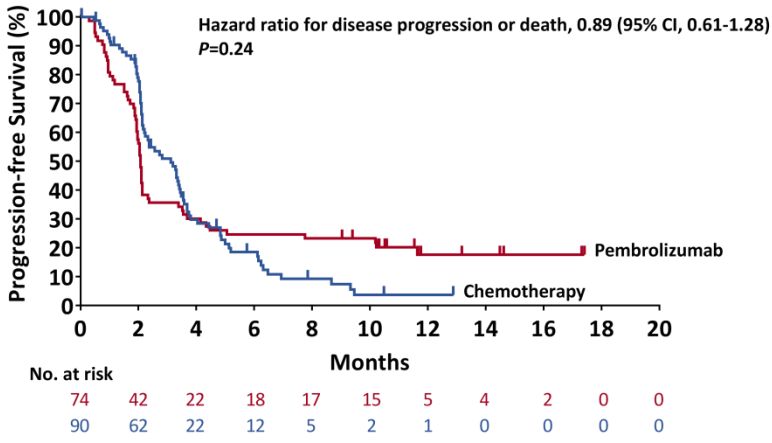

**Figure S3. Duration of Response in Patients With an Objective Response In the Total (Panel A) and PD-L1 Combined Positive Score  $\geq 10\%$  Populations.** Shown are Kaplan-Meier estimates of duration of response according to treatment group. Tick marks represent patients censored at the last time they were known to be radiologic disease progression assessed per Response Evaluation Criteria in Solid Tumors, version 1.1, by blinded, independent, central radiology review. PD-L1 combined positive score (CPS) was defined as the percentage of tumor and infiltrating immune cells with PD-L1 expression out of the total number of tumor cells.

(A)

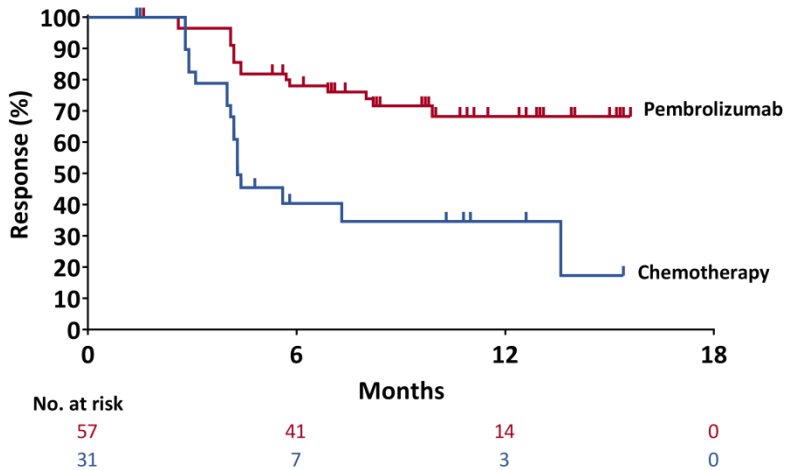

(B)

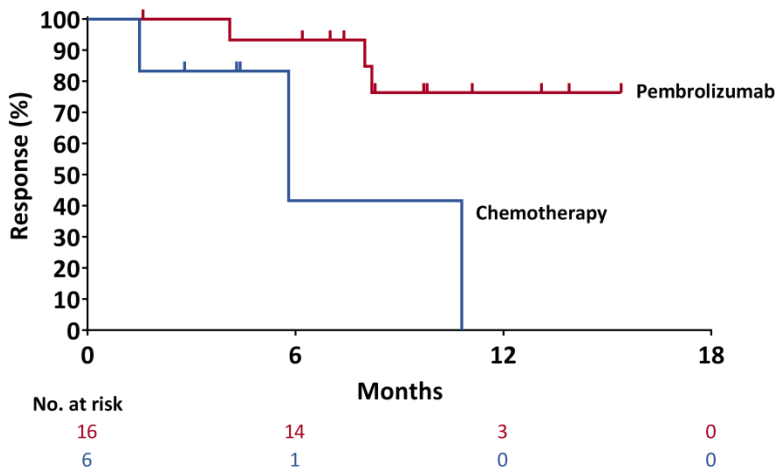



**Table S1. One-Sided Superiority Thresholds for Pembrolizumab in the Intention-To-Treat Population at the Second Interim Analysis.\***

|                                                      | <b>Before Alpha<br/>Roll Over</b> | <b>After Alpha Roll<br/>Over</b> |
|------------------------------------------------------|-----------------------------------|----------------------------------|
| Overall survival, total population                   | P=0.0068                          | P=0.0123                         |
| Progression-free survival, total population          | P=0.0007                          | P=0.0151                         |
| Overall survival, CPS $\geq$ 10% population          | P=0.0065                          | P=0.0065                         |
| Progression-free survival, CPS $\geq$ 10% population | P=0.0029                          | P=0.0029                         |
| Objective response rate, total population            | —                                 | P=0.0170                         |

\*The intention-to-treat population includes all patients who were randomly allocated to treatment. Response was assessed per Response Evaluation Criteria in Solid Tumors, version 1.1, by blinded, independent, central radiology review. PD-L1 combined positive score (CPS) was defined as the percentage of tumor and infiltrating immune cells with PD-L1 expression out of the total number of tumor cells. Full details of the statistical analysis plan are found in the study protocol.

**Table S2. Baseline Demographics and Disease Characteristics in the Intention-to-Treat Population.\***

|                                               | <b>Pembrolizumab Group<br/>(N=270)</b> | <b>Chemotherapy Group<br/>(N=272)</b> |
|-----------------------------------------------|----------------------------------------|---------------------------------------|
| Age                                           |                                        |                                       |
| Median (range), yr                            | 67.0 (29-88)                           | 65.0 (26-84)                          |
| ≥65 yr, no. (%)                               | 165 (61.1)                             | 147 (54.0)                            |
| Male sex, no. (%)                             | 200 (74.1)                             | 202 (74.3)                            |
| ECOG performance status, <sup>†</sup> no. (%) |                                        |                                       |
| 0                                             | 119 (44.1)                             | 106 (39.0)                            |
| 1                                             | 143 (53.0)                             | 158 (58.1)                            |
| 2                                             | 2 (0.7)                                | 4 (1.5)                               |
| Smoking status, <sup>‡</sup> no. (%)          |                                        |                                       |
| Current                                       | 29 (10.7)                              | 38 (14.0)                             |
| Former                                        | 136 (50.4)                             | 148 (54.4)                            |
| Never                                         | 104 (38.5)                             | 83 (30.5)                             |
| Histology, <sup>§</sup> no. (%)               |                                        |                                       |
| Pure transitional cell                        | 186 (68.9)                             | 197 (72.4)                            |
| Predominantly transitional cell               | 82 (30.4)                              | 73 (26.8)                             |
| PD-L1 CPS, <sup>  </sup> no. (%)              |                                        |                                       |
| <10%                                          | 186 (68.9)                             | 176 (64.7)                            |
| ≥10%                                          | 74 (27.4)                              | 90 (33.1)                             |
| Site of primary tumor, <sup>¶</sup> no. (%)   |                                        |                                       |

|                                                                                  |            |            |
|----------------------------------------------------------------------------------|------------|------------|
| Upper tract (renal pelvis or ureter)                                             | 38 (14.1)  | 37 (13.6)  |
| Lower tract (bladder or urethra)                                                 | 232 (85.9) | 234 (86.0) |
| Visceral disease, no. (%)                                                        | 240 (88.9) | 233 (85.7) |
| Liver metastases                                                                 | 91 (33.7)  | 95 (34.9)  |
| Hemoglobin level,** no. (%)                                                      |            |            |
| <10 g/dL (<100 g/L)                                                              | 43 (15.9)  | 44 (16.2)  |
| ≥10 g/dL (≥100 g/L)                                                              | 219 (81.1) | 223 (82.0) |
| No. of risk factors,†† no. (%)                                                   |            |            |
| 0                                                                                | 54 (20.0)  | 44 (16.2)  |
| 1                                                                                | 96 (35.6)  | 97 (35.7)  |
| 2                                                                                | 66 (24.4)  | 80 (29.4)  |
| 3-4                                                                              | 45 (16.7)  | 45 (16.5)  |
| Setting of most recent prior therapy,‡‡ no. (%)                                  |            |            |
| Neoadjuvant or adjuvant                                                          | 31 (11.5)  | 53 (19.5)  |
| First line                                                                       | 183 (67.8) | 157 (57.7) |
| Second line                                                                      | 55 (20.4)  | 60 (22.1)  |
| Time since completion or discontinuation of most recent prior therapy,§§ no. (%) |            |            |
| <3 months                                                                        | 103 (38.1) | 104 (38.2) |
| ≥3 months                                                                        | 166 (61.5) | 167 (61.4) |
| Prior platinum,§§ no. (%)                                                        |            |            |
| Cisplatin                                                                        | 198 (73.3) | 213 (78.3) |
| Carboplatin                                                                      | 70 (25.9)  | 56 (20.6)  |

|                                                 |           |           |
|-------------------------------------------------|-----------|-----------|
| Oxaliplatin or nedaplatin                       | 1 (0.4)   | 2 (0.7)   |
| Prior cystectomy or nephroureterectomy, no. (%) | 61 (22.6) | 51 (18.8) |
| Prior Bacillus Calmette–Guérin therapy, no. (%) | 32 (11.9) | 22 (8.1)  |

\*The intention-to-treat population includes all patients who were randomly allocated to treatment. There were no significant difference between treatment groups.

†Eastern Cooperative Oncology Group (ECOG) performance status ranges from 0 to 5, with 0 indicating no symptoms and higher score indicating increasing disability. Six (2.2%) patients in the pembrolizumab group and 4 (1.5%) patients in the chemotherapy group had a missing ECOG performance status.

‡Smoking status was missing for 1 (0.4%) patient in the pembrolizumab group and 3 (1.1%) patients in the chemotherapy group.

§One (0.7%) patient in the pembrolizumab group had clear cell adenocarcinoma, and 1 (0.7%) patient had unknown histology. Two (0.7%) patients in the chemotherapy group had missing histology.

||PD-L1 combined positive score (CPS) was defined as the percentage of tumor and infiltrating immune cells with PD-L1 expression out of the total number of tumor cells. PD-L1 CPS was not evaluable for 10 (3.7%) patients in the pembrolizumab group and 6 (2.2%) in the chemotherapy group.

¶Primary tumor site was missing for 1 (0.4%) patient in the chemotherapy group.

\*\*Baseline hemoglobin level was missing for 8 (3.0%) patients in the pembrolizumab group and 5 (1.8%) patients in the chemotherapy group.

††Risk factors include the Bellmunt risk factors of ECOG performance status >0, hemoglobin level <10 g/dL (<100 g/L), and presence of liver metastases<sup>1</sup> plus time since completion or discontinuation of <3 months.<sup>2</sup> The number of risk factors was unknown for 9 (3.3%) patients in the pembrolizumab group and 6 (2.2%) patients in the chemotherapy group.

‡‡The setting of the most recent prior therapy was the third line for 1 (0.4%) patient in the chemotherapy group and was missing for 1 (0.4%) patient each in the pembrolizumab and chemotherapy groups.

§§The time since completion or discontinuation of most recent prior therapy and the specific prior platinum were missing for 1 (0.4%) patient in each treatment group.

**Table S3. Baseline Demographics and Disease Characteristics in the PD-L1 Combined Positive Score  $\geq 10\%$  Intention-to-Treat Population.\***

|                                               | <b>Pembrolizumab Group<br/>(N=74)</b> | <b>Chemotherapy Group<br/>(N=90)</b> |
|-----------------------------------------------|---------------------------------------|--------------------------------------|
| Age, yr, median (range)                       | 66.0 (43-88)                          | 63.0 (38-83)                         |
| Male sex, no. (%)                             | 54 (73.0)                             | 60 (66.7)                            |
| ECOG performance status, <sup>†</sup> no. (%) |                                       |                                      |
| 0                                             | 32 (43.2)                             | 33 (36.7)                            |
| 1                                             | 40 (54.1)                             | 55 (66.1)                            |
| 2                                             | 1 (1.4)                               | 2 (2.2)                              |
| Smoking status, no. (%)                       |                                       |                                      |
| Current                                       | 8 (10.8)                              | 15 (16.7)                            |
| Former                                        | 27 (36.5)                             | 45 (50.0)                            |
| Never                                         | 39 (52.7)                             | 30 (33.3)                            |
| Histology, <sup>‡</sup> no. (%)               |                                       |                                      |
| Pure transitional cell                        | 40 (54.1)                             | 59 (65.6)                            |
| Predominantly transitional cell               | 33 (44.6)                             | 3 (34.4)                             |
| Site of primary tumor, no. (%)                |                                       |                                      |
| Upper tract                                   | 13 (17.6)                             | 12 (13.3)                            |
| Lower tract                                   | 61 (82.4)                             | 78 (86.7)                            |
| Visceral disease, no. (%)                     |                                       |                                      |
| Liver metastases                              | 28 (37.8)                             | 29 (32.2)                            |
| Hemoglobin level, <sup>§</sup> no. (%)        |                                       |                                      |

|                                                                                  |           |           |
|----------------------------------------------------------------------------------|-----------|-----------|
| <10 g/dL (<100 g/L)                                                              | 18 (24.3) | 13 (14.4) |
| ≥10 g/dL (≥100 g/L)                                                              | 53 (71.6) | 77 (85.6) |
| No. of risk factors,   no. (%)                                                   |           |           |
| 0                                                                                | 13 (17.6) | 16 (17.8) |
| 1                                                                                | 20 (27.0) | 33 (36.7) |
| 2                                                                                | 15 (20.3) | 22 (24.4) |
| 3-4                                                                              | 23 (31.1) | 19 (21.1) |
| Setting of most recent prior therapy,¶ no. (%)                                   |           |           |
| Neoadjuvant or adjuvant                                                          | 11 (14.9) | 21 (23.3) |
| First line                                                                       | 43 (58.1) | 47 (52.2) |
| Second line                                                                      | 19 (25.7) | 22 (24.4) |
| Time since completion or discontinuation of most recent prior therapy,** no. (%) |           |           |
| <3 months                                                                        | 42 (56.8) | 38 (42.2) |
| ≥3 months                                                                        | 31 (41.9) | 52 (57.8) |
| Prior platinum,** no. (%)                                                        |           |           |
| Cisplatin                                                                        | 59 (79.7) | 70 (77.8) |
| Carboplatin                                                                      | 14 (18.9) | 19 (21.1) |
| Nedaplatin                                                                       | 0         | 1 (1.1)   |
| Prior cystectomy or<br>nephroureterectomy, no. (%)                               | 12 (16.2) | 17 (18.9) |
| Prior Bacillus Calmette–Guérin<br>therapy, no. (%)                               | 2 (2.7)   | 9 (10.0)  |

\*The intention-to-treat population includes all patients who were randomly allocated to treatment. PD-L1 combined positive score (CPS) was defined as the percentage of tumor and infiltrating immune cells with PD-L1 expression out of the total number of tumor cells.

†Eastern Cooperative Oncology Group (ECOG) performance status ranges from 0 to 5, with 0 indicating no symptoms and higher score indicating increasing disability. 1 (1.4%) patient in the pembrolizumab group had a missing ECOG performance status.

‡One (1.4%) patient in the pembrolizumab group had unknown histology.

§Baseline hemoglobin level was missing for 3 (4.1%) patients in the pembrolizumab group.

||Risk factors include the Bellmunt risk factors of ECOG performance status >0, hemoglobin level <10 g/dL (<100 g/L), and presence of liver metastases<sup>1</sup> plus time since completion or discontinuation of <3 months.<sup>2</sup> The number of risk factors was unknown for 3 (4.1%) patients in the pembrolizumab group.

¶The setting of the most recent prior therapy was missing for 1 (1.4%) patient in the pembrolizumab group.

\*\*The time since completion or discontinuation of most recent prior therapy and the specific prior platinum were missing for 1 (1.4%) patient in the pembrolizumab group.



**Table S4. Summary of Response in the Total and PD-L1 Combined Positive Score Intention-to-Treat Populations.\***

| Variable                                   | Total Population                  |                                  | CPS $\geq$ 10% Population        |                                 |
|--------------------------------------------|-----------------------------------|----------------------------------|----------------------------------|---------------------------------|
|                                            | Pembrolizumab<br>Group<br>(N=270) | Chemotherapy<br>Group<br>(N=272) | Pembrolizumab<br>Group<br>(N=74) | Chemotherapy<br>Group<br>(N=90) |
| Objective response <sup>†</sup>            |                                   |                                  |                                  |                                 |
| No. of patients                            | 57                                | 31                               | 16                               | 6                               |
| % (95% CI)                                 | 21.1 (16.4 to 26.5)               | 11.4 (7.9 to 15.8)               | 21.6 (12.9 to 32.7)              | 6.7 (2.5 to 13.9)               |
| Time to response, <sup>‡</sup> months      |                                   |                                  |                                  |                                 |
| Median (range)                             | 2.1 (1.4 to 6.3)                  | 2.1 (1.7 to 4.9)                 | 2.1 (1.4 to 5.3)                 | 2.1 (1.9 to 2.2)                |
| Duration of response, <sup>‡§</sup> months |                                   |                                  |                                  |                                 |
| Median (range)                             | NR (1.6+ to 15.6+)                | 4.3 (1.4+ to 15.4+)              | NR (1.6+ to 15.4+)               | 4.4 (1.5+ to 10.8+)             |
| Response $\geq$ 6 months                   | 41 (78)                           | 7 (40)                           | 14 (93)                          | 1 (40)                          |
| Response $\geq$ 12 months                  | 14 (68)                           | 3 (35)                           | 3 (76)                           | 0                               |
| Best overall response, no. (%)             |                                   |                                  |                                  |                                 |
| Complete response                          | 19 (7.0)                          | 9 (3.3)                          | 5 (6.8)                          | 2 (2.2)                         |

|                               |            |           |           |           |
|-------------------------------|------------|-----------|-----------|-----------|
| Partial response              | 38 (14.1)  | 22 (8.1)  | 11 (14.9) | 4 (4.4)   |
| Stable disease                | 47 (17.4)  | 91 (33.5) | 9 (12.2)  | 35 (35.6) |
| Progressive disease           | 131 (48.5) | 90 (33.1) | 37 (50.0) | 38 (31.1) |
| Nonevaluable or no assessment | 35 (13.0)  | 60 (22.1) | 12 (16.2) | 24 (26.7) |

\*The intention-treat population includes all patients who were randomly allocated to treatment. PD-L1 combined positive score (CPS)

was defined as the percentage of tumor and infiltrating immune cells with PD-L1 expression out of the total number of tumor cells.

Response was assessed by Response Evaluation Criteria in Solid Tumors, version 1.1, but blinded, independent, central radiology review.

†Objective response included patients with confirmed complete or partial response. The estimated difference between the pembrolizumab and chemotherapy groups, assessed using the stratified Miettinen and Nurminen's method, was 9.6 percentage points (95% CI, 3.5 to 15.9) (P=0.0011) in the total population and 19.3 percentage points (95% CI, 8.6-31.7) in the CPS  $\geq$ 10% population.

The one-sided superiority threshold for pembrolizumab in the total population was P=0.0170. No alpha was allocated to the comparison of response rate in the CPS  $\geq$ 10% population.

‡Time to and duration of response were assessed in patients who experienced an objective response.

§Duration of response was calculated using the Kaplan-Meier method. Plus signs in the ranges indicate that the response was ongoing at the time of data cutoff.

**Table S5. Adverse Events, Regardless of Attribution to Treatment by the Investigator, With Incidence of At Least 5% in the As-Treated Population.\***

| Adverse Event,<br>no. (%)            | Pembrolizumab Group<br>(N=266) |                  | Chemotherapy Group<br>(N=255) |                  |
|--------------------------------------|--------------------------------|------------------|-------------------------------|------------------|
|                                      | Any Grade                      | Grade 3, 4, or 5 | Any Grade                     | Grade 3, 4, or 5 |
| Any                                  | 248 (93.2)                     | 139 (52.3)       | 250 (98.0)                    | 160 (62.7)       |
| Led to discontinuation               | 22 (8.3)                       | 18 (6.8)         | 32 (12.5)                     | 20 (7.8)         |
| Led to death                         | 13 (3.9)                       | 13 (3.9)         | 8 (3.1)                       | 8 (3.1)          |
| Individual events†                   |                                |                  |                               |                  |
| Blood and lymphatic system disorders | 53 (19.9)                      | 25 (9.4)         | 130 (51.0)                    | 76 (29.8)        |
| Anemia                               | 46 (17.3)                      | 22 (8.3)         | 91 (35.7)                     | 31 (12.2)        |
| Febrile neutropenia                  | 0                              | 0                | 19 (7.5)                      | 19 (7.5)         |
| Neutropenia                          | 0                              | 0                | 43 (16.9)                     | 37 (14.5)        |
| Cardiac disorders                    | 15 (5.6)                       | 3 (1.1)          | 16 (6.3)                      | 4 (1.6)          |
| Endocrine disorders                  | 28 (10.5)                      | 3 (1.1)          | 4 (1.6)                       | 0                |
| Hypothyroidism                       | 17 (6.4)                       | 0                | 3 (1.2)                       | 0                |
| Eye disorders                        | 20 (7.5)                       | 2 (0.8)          | 17 (6.7)                      | 0                |

|                                                      |            |           |            |           |
|------------------------------------------------------|------------|-----------|------------|-----------|
| Gastrointestinal disorders                           | 150 (56.4) | 20 (7.5)  | 174 (68.2) | 41 (16.1) |
| Abdominal pain                                       | 34 (12.8)  | 3 (1.1)   | 34 (13.3)  | 7 (2.7)   |
| Abdominal pain upper                                 | 9 (3.4)    | 0         | 14 (5.5)   | 1 (0.4)   |
| Constipation                                         | 50 (18.8)  | 3 (1.1)   | 81 (31.8)  | 8 (3.1)   |
| Diarrhea                                             | 43 (16.2)  | 4 (1.5)   | 48 (18.8)  | 4 (1.6)   |
| Nausea                                               | 55 (20.7)  | 3 (1.1)   | 73 (28.6)  | 4 (1.6)   |
| Stomatitis                                           | 6 (2.3)    | 1 (0.4)   | 22 (8.6)   | 1 (0.4)   |
| Vomiting                                             | 39 (14.7)  | 1 (0.4)   | 34 (13.3)  | 1 (0.4)   |
| General disorders and administration site conditions | 153 (57.5) | 21 (7.9)  | 184 (72.2) | 38 (14.9) |
| Asthenia                                             | 30 (11.3)  | 2 (0.8)   | 53 (20.8)  | 13 (5.1)  |
| Fatigue                                              | 69 (25.9)  | 10 (3.8)  | 86 (33.7)  | 15 (5.9)  |
| Mucosal inflammation                                 | 5 (1.9)    | 1 (0.4)   | 20 (7.8)   | 4 (1.6)   |
| Peripheral edema                                     | 26 (9.8)   | 0         | 40 (15.7)  | 2 (0.8)   |
| Pyrexia                                              | 36 (13.5)  | 2 (0.8)   | 33 (12.9)  | 3 (1.2)   |
| Infections and infestations                          | 105 (39.5) | 36 (13.5) | 94 (36.9)  | 29 (11.4) |

|                                                |            |           |           |           |
|------------------------------------------------|------------|-----------|-----------|-----------|
| Nasopharyngitis                                | 14 (5.3)   | 0         | 4 (1.6)   | 0         |
| Urinary tract infection                        | 39 (14.7)  | 13 (4.9)  | 34 (13.3) | 11 (4.3)  |
| Injury, poisoning and procedural complications | 25 (9.4)   | 6 (2.3)   | 24 (9.4)  | 4 (1.6)   |
| Investigations                                 | 77 (28.9)  | 22 (8.3)  | 89 (34.9) | 42 (16.5) |
| ALT increased                                  | 14 (5.3)   | 3 (1.1)   | 4 (1.6)   | 0         |
| AST increased                                  | 14 (5.3)   | 6 (2.3)   | 3 (1.2)   | 0         |
| Blood creatinine increased                     | 13 (4.9)   | 2 (0.8)   | 15 (5.9)  | 1 (0.4)   |
| Neutrophil count decreased                     | 1 (0.4)    | 1 (0.4)   | 38 (14.9) | 32 (12.5) |
| Weight decreased                               | 24 (9.0)   | 2 (0.8)   | 21 (8.2)  | 0         |
| White blood cell count decreased               | 1 (0.4)    | 1 (0.4)   | 20 (7.8)  | 14 (5.5)  |
| Metabolism and nutrition disorders             | 101 (38.0) | 31 (11.7) | 97 (38.0) | 28 (11.0) |
| Decreased appetite                             | 56 (21.1)  | 10 (3.8)  | 53 (20.8) | 3 (1.2)   |
| Hyponatremia                                   | 15 (5.6)   | 5 (1.9)   | 18 (7.1)  | 8 (3.1)   |
| Musculoskeletal                                | 113 (42.5) | 14 (5.3)  | 95 (37.3) | 10 (3.9)  |

|                                                                     |           |          |            |          |
|---------------------------------------------------------------------|-----------|----------|------------|----------|
| and connective tissue disorders                                     |           |          |            |          |
| Arthralgia                                                          | 24 (9.0)  | 0        | 30 (11.8)  | 3 (1.2)  |
| Back pain                                                           | 37 (13.9) | 2 (0.8)  | 21 (8.2)   | 1 (0.4)  |
| Myalgia                                                             | 14 (5.3)  | 1 (0.4)  | 17 (6.7)   | 0        |
| Pain in extremity                                                   | 21 (7.9)  | 0        | 28 (11.0)  | 3 (1.2)  |
| Neoplasms benign, malignant and unspecified (incl cysts and polyps) | 18 (6.8)  | 11 (4.1) | 12 (4.7)   | 5 (2.0)  |
| Nervous system disorders                                            | 58 (21.8) | 5 (1.9)  | 105 (41.2) | 17 (6.7) |
| Dizziness                                                           | 15 (5.6)  | 0        | 19 (7.5)   | 1 (0.4)  |
| Dysgeusia                                                           | 7 (2.6)   | 0        | 18 (7.1)   | 0        |
| Headache                                                            | 13 (4.9)  | 1 (0.4)  | 13 (5.1)   | 0        |
| Neuropathy peripheral                                               | 1 (0.4)   | 0        | 31 (12.2)  | 2 (0.8)  |
| Peripheral sensory neuropathy                                       | 2 (0.8)   | 0        | 28 (11.0)  | 5 (2.0)  |
| Psychiatric                                                         | 38 (14.3) | 1 (0.4)  | 43 (16.9)  | 2 (0.8)  |

|                                                 |            |           |            |          |
|-------------------------------------------------|------------|-----------|------------|----------|
| disorders                                       |            |           |            |          |
| Insomnia                                        | 16 (6.0)   | 1 (0.4)   | 19 (7.5)   | 0        |
| Renal and urinary disorders                     | 72 (27.1)  | 27 (10.2) | 45 (17.6)  | 10 (3.9) |
| Acute kidney injury                             | 15 (5.6)   | 7 (2.6)   | 7 (2.7)    | 3 (1.2)  |
| Hematuria                                       | 30 (11.3)  | 6 (2.3)   | 20 (7.8)   | 4 (1.6)  |
| Reproductive system and breast disorders        | 18 (6.8)   | 2 (0.8)   | 8 (3.1)    | 2 (0.8)  |
| Respiratory, thoracic and mediastinal disorders | 91 (34.2)  | 15 (5.6)  | 75 (29.4)  | 9 (3.5)  |
| Cough                                           | 38 (14.3)  | 1 (0.4)   | 18 (7.1)   | 0        |
| Dyspnea                                         | 33 (12.4)  | 5 (1.9)   | 23 (9.0)   | 3 (1.2)  |
| Skin and subcutaneous tissue disorders          | 114 (42.9) | 1 (0.4)   | 127 (49.8) | 6 (2.4)  |
| Alopecia                                        | 2 (0.8)    | 0         | 99 (38.8)  | 3 (1.2)  |
| Dry skin                                        | 14 (5.3)   | 0         | 9 (3.5)    | 0        |
| Pruritus                                        | 62 (23.3)  | 0         | 14 (5.5)   | 1 (0.4)  |
| Rash                                            | 29 (10.9)  | 1 (0.4)   | 16 (6.3)   | 0        |

|                    |           |          |           |         |
|--------------------|-----------|----------|-----------|---------|
| Vascular disorders | 39 (14.7) | 11 (4.1) | 32 (12.5) | 4 (1.6) |
|--------------------|-----------|----------|-----------|---------|

\*The as-treated population includes all patients who received at least one dose of study

treatment.

†Events are listed alphabetically by system organ class.



## References

1. Bellmunt J, Choueiri TK, Fougerey R, et al. Prognostic factors in patients with advanced transitional cell carcinoma of the urothelial tract experiencing treatment failure with platinum-containing regimens. *J Clin Oncol* 2010;28:1850-5.
2. Sonpavde G, Pond GR, Fougerey R, et al. Time from prior chemotherapy enhances prognostic risk grouping in the second-line setting of advanced urothelial carcinoma: a retrospective analysis of pooled, prospective phase 2 trials. *Eur Urol* 2013;63:717-23.
